# Supplementary material
Source: MDPI journal article supplement (https://www.mdpi.com/2076-3417/13/2/1072)
Supplement: s1 [file s1]

## Supplementary material

# Conditions for and Characteristics of the Dispersion of Gel Fuel Droplets during Ignition

Dmitriy Feoktistov <sup>1</sup>, Evgeniya Orlova <sup>2</sup>, Dmitriy Glushkov <sup>1,\*</sup>, Akram Abedtazehabadi <sup>2</sup> and Saveliy Belyaev <sup>1</sup>

<sup>1</sup> Heat and Mass Transfer Laboratory, National Research Tomsk Polytechnic University, 634050 Tomsk, Russia

<sup>2</sup> School of Energy & Power Engineering, National Research Tomsk Polytechnic University, 634050 Tomsk, Russia

\* Correspondence: dmitriyog@tpu.ru

**Table S1.** Static contact angles ( $\theta \pm \Delta\theta$ ) formed by droplets of studied liquids and surfaces of AMG-6 and PTFE.

| Liquid                                                                               | $\theta \pm \Delta\theta$ (°) on AMG-6 | $\theta \pm \Delta\theta$ (°) on PTFE |
|--------------------------------------------------------------------------------------|----------------------------------------|---------------------------------------|
| <b>1<sup>st</sup> group (polar liquids)</b>                                          |                                        |                                       |
| Water                                                                                | 88.5 ± 2.5                             | 105.0 ± 3.5                           |
| Monoethanolamine                                                                     | 69.2 ± 2.2                             | 90.1 ± 2.1                            |
| <b>2<sup>nd</sup> group (dispersive liquids with a high value of the polar part)</b> |                                        |                                       |
| Glycerol                                                                             | 72.1 ± 2.6                             | 90.3 ± 2.1                            |
| Ethylene glycol                                                                      | 56.3 ± 1.8                             | 81.0 ± 2.0                            |
| <b>3<sup>rd</sup> group (dispersive liquids with a low value of the polar part)</b>  |                                        |                                       |
| Acetone                                                                              | < 5                                    | 44.5 ± 2.8                            |
| Ethyl alcohol 95%                                                                    | < 5                                    | 35.5 ± 2.9                            |
| <b>4<sup>th</sup> group (dispersive liquids)</b>                                     |                                        |                                       |
| Diiodomethane                                                                        | 64.0 ± 2.4                             | 77.9 ± 4.5                            |
| Dodecane                                                                             | 10.1 ± 2.9                             | 49.0 ± 3.5                            |
| Synthetic engine oil                                                                 | 22.4 ± 3.1                             | 54.8 ± 3.4                            |
| Compressor oil                                                                       | 25.8 ± 2.9                             | 53.4 ± 3.2                            |
| Oil TEDEX TU 32                                                                      | 29.7 ± 3.6                             | 57.5 ± 3.9                            |

**Table S2.** Surface free energy the liquid-liquid interface formation

| Binary liquid             | $\Delta G$ |
|---------------------------|------------|
| Water + Monoethanolamine  | -117.93    |
| Water + Glycerol          | -130.19    |
| Water + Ethylene glycol   | -110.45    |
| Water + Acetone           | -69.05     |
| Water + Ethyl alcohol 95% | -69.70     |

---

|                                         |         |
|-----------------------------------------|---------|
| Water + Diiodomethane                   | -66.56  |
| Water + Dodecane                        | -47.06  |
| Water + Synthetic engine oil            | -69.72  |
| Water + Compressor oil                  | -50.84  |
| Water + Oil TEDEX TU 32                 | -70.22  |
| Monoethanolamine + Glycerol             | -108.47 |
| Monoethanolamine + Ethylene glycol      | -92.65  |
| Monoethanolamine + Acetone              | -59.86  |
| Monoethanolamine + Ethyl alcohol 95%    | -59.54  |
| Monoethanolamine + Diiodomethane        | -61.81  |
| Monoethanolamine + Dodecane             | -43.70  |
| Monoethanolamine + Synthetic engine oil | -61.89  |
| Monoethanolamine + Compressor oil       | -46.97  |
| Monoethanolamine + Oil TEDEX TU 32      | -62.68  |
| Glycerol + Ethylene glycol              | -109.75 |
| Glycerol + Acetone                      | -75.28  |
| Glycerol + Ethyl alcohol 95%            | -72.93  |
| Glycerol + Diiodomethane                | -86.71  |
| Glycerol + Dodecane                     | -61.31  |
| Glycerol + Synthetic engine oil         | -80.98  |
| Glycerol + Compressor oil               | -65.40  |
| Glycerol + Oil TEDEX TU 32              | -82.75  |
| Ethylene glycol + Acetone               | -66.70  |
| Ethylene glycol + Ethyl alcohol 95%     | -64.09  |
| Ethylene glycol + Diiodomethane         | -79.24  |
| Ethylene glycol + Dodecane              | -56.03  |
| Ethylene glycol + Synthetic engine oil  | -72.59  |

---

---

|                                          |        |
|------------------------------------------|--------|
| Ethylene glycol + Compressor oil         | -59.65 |
| Ethylene glycol + Oil TEDEX TU 32        | -74.37 |
| Acetone + Ethyl alcohol 95%              | -46.88 |
| Acetone + Diiodomethane                  | -67.01 |
| Acetone + Dodecane                       | -47.39 |
| Acetone + Synthetic engine oil           | -57.35 |
| Acetone + Compressor oil                 | -50.10 |
| Acetone + Oil TEDEX TU 32                | -59.32 |
| Ethyl alcohol 95% + Diiodomethane        | -59.63 |
| Ethyl alcohol 95% + Dodecane             | -42.17 |
| Ethyl alcohol 95% + Synthetic engine oil | -52.40 |
| Ethyl alcohol 95% + Compressor oil       | -44.70 |
| Ethyl alcohol 95% + Oil TEDEX TU 32      | -53.99 |
| Diiodomethane + Dodecane                 | -71.84 |
| Diiodomethane + Synthetic engine oil     | -80.64 |
| Diiodomethane + Compressor oil           | -75.43 |
| Diiodomethane + Oil TEDEX TU 32          | -84.33 |
| Dodecane + Synthetic engine oil          | -57.02 |
| Dodecane + Compressor oil                | -53.34 |
| Dodecane + Oil TEDEX TU 32               | -59.63 |
| Synthetic engine oil + Compressor oil    | -60.10 |
| Synthetic engine oil + Oil TEDEX TU 32   | -69.41 |
| Compressor oil + Oil TEDEX TU 32         | -62.82 |

---
